# Supplementary material for: Mathematical modelling of spatio-temporal glioma evolution
Source: Springer Nature journal article supplement (doi:10.1186/1742-4682-10-47), 2013-07-24
Supplement: 12976_2013_423_MOESM1_ESM.pdf [file 12976_2013_423_MOESM1_ESM.pdf]

**Table A1 - Parameter values**

Parameter values used for the model simulations.

| Parameter Values                                |                      |                        |                       |                                           |
|-------------------------------------------------|----------------------|------------------------|-----------------------|-------------------------------------------|
| Parameters                                      | Symbols              | Values                 | Units                 | Sources                                   |
| Tissue maximum carrying capacity                | $C_m$                | $2.39 \cdot 10^5$      | cells/mm <sup>3</sup> | Considered taken into account data of [1] |
| Initial tumor cell density                      | $C_0$                | $10^4$                 | cells/mm <sup>3</sup> | Considered taken into account data of [2] |
| Initial tumor radius                            | $r_0$                | 1                      | mm                    | [1]                                       |
| Diffusion coefficient of proliferative cells    | $D_c$                | 0.005 - 0.3            | mm <sup>2</sup> /day  | [1]                                       |
| Diffusion coefficient of hypoxic cells          | $D_h$                | $D_c \cdot 10$         | mm <sup>2</sup> /day  | Considered taken into account [1], [3]    |
| Diffusion coefficient of hypoglycemic cells     | $D_q$                | $D_c$                  | mm <sup>2</sup> /day  | Considered taken into account [1], [3]    |
| Proliferation rate constant                     | $\rho$               | 0.0025 - 0.04          | 1/day                 | [1]                                       |
| Initial ECM concentration outside the tumor     | $f_0$                | $10^{-9}$              | mol/mm <sup>3</sup>   | [4]                                       |
| Initial intratumoral ECM concentration          | $f_{0\text{tumor}}$  | $f_0/10$               | mol/mm <sup>3</sup>   | Considered taken into account data of [4] |
| Initial MDEs concentration outside the tumor    | $m_0$                | 0                      | mol/mm <sup>3</sup>   | [5]                                       |
| Initial intratumoral MDEs concentration         | $m_{0\text{tumor}}$  | $0.5 \cdot C_0$        | mol/mm <sup>3</sup>   | [5]                                       |
| Initial oxygen concentration outside the tumor  | $n_0$                | $0.28 \cdot 10^{-9}$   | mol/mm <sup>3</sup>   | [6], [7], [8]                             |
| Initial intratumoral oxygen concentration       | $n_{0\text{tumor}}$  | $n_0 \cdot e^{-dr}$    | mol/mm <sup>3</sup>   | Calculated from [6]                       |
| Initial glucose concentration outside the tumor | $gl_0$               | $16.5 \cdot 10^{-9}$   | mol/mm <sup>3</sup>   | [6], [7], [8]                             |
| Initial intratumoral glucose concentration      | $gl_{0\text{tumor}}$ | $gl_0 \cdot e^{-d(r)}$ | mol/mm <sup>3</sup>   | Calculated from [6]                       |

|                                                   |                |                          |                          |                                                                    |
|---------------------------------------------------|----------------|--------------------------|--------------------------|--------------------------------------------------------------------|
| Diffusion coefficient of MDEs                     | $D_m$          | 0.00864                  | mm <sup>2</sup> /day     | [4]                                                                |
| Diffusion coefficient of oxygen                   | $D_n$          | 157.248                  | mm <sup>2</sup> /day     | [6], [9]                                                           |
| Diffusion coefficient of glucose                  | $D_{gl}$       | 9.504                    | mm <sup>2</sup> /day     | [6], [10]                                                          |
| Oxygen natural decay rate                         | $\alpha_n$     | 0.0375                   | 1/day                    | Calculated from [4], [11]                                          |
| Oxygen production rate                            | $\beta_n$      | 0.5025                   | 1/day                    | Calculated from [4], [11]                                          |
| Glucose natural decay rate                        | $\alpha_{gl}$  | 0.11                     | 1/day                    | Assumed based on [6], [4], [11]                                    |
| Glucose production rate                           | $\beta_{gl}$   | 1.1                      | 1/day                    | Assumed based on [4], [11]                                         |
| Oxygen consumption rate by proliferative cells    | $\gamma_{cn}$  | $5.2 \cdot 10^{-12}$     | mol/cell*day             | Calculated from [6], [7]                                           |
| Oxygen consumption rate by hypoxic cells          | $\gamma_{hn}$  | $0.2 \cdot \gamma_{cn}$  | mol/cell*day             | Considered taken into account [3], [4], [6], [7], [12]             |
| Oxygen consumption rate by hypoglycemic cells     | $\gamma_{qn}$  | $0.5 \cdot \gamma_{cn}$  | mol/cell*day             | Considered taken into account [4], [6], [7]                        |
| Glucose consumption rate by proliferative cells   | $\gamma_{cgl}$ | $1.446 \cdot 10^{-12}$   | mol/cell*day             | Calculated from [6], [7], [13]                                     |
| Glucose consumption rate by hypoxic cells         | $\gamma_{hgl}$ | $10 \cdot \gamma_{cgl}$  | mol/cell*day             | Considered taken into account [4], [6], [13]                       |
| Glucose consumption rate by hypoglycemic cells    | $\gamma_{qgl}$ | $0.5 \cdot \gamma_{cgl}$ | mol/cell*day             | Considered taken into account [4], [6], [14]                       |
| ECM degradation rate                              | $\delta$       | 0.0022388                | mm <sup>3</sup> /mol*day | Calculated from [4], [11]                                          |
| MDEs natural decay rate                           | $\lambda$      | 0.432                    | 1/day                    | [15]                                                               |
| MDEs production rate by proliferative cells       | $\mu_c$        | 0.006                    | mol/cell*day             | [15]                                                               |
| MDEs production rate by hypoxic cells             | $\mu_h$        | $2 \cdot \mu_c$          | mol/cell*day             | Considered taken into account [3]                                  |
| MDEs production rate by hypoglycemic cells        | $\mu_q$        | $\mu_c$                  | mol/cell*day             | Assumed in this model                                              |
| Conversion rate of proliferative to hypoxic cells | $b_h$          | $(1 - n/n_0)/20$         | 1/day                    | Calculated to be proportional to the relative oxygen concentration |
| Conversion rate of                                | $g_h$          | 0.05                     | 1/day                    | [1]                                                                |

|                                                                                                               |           |                          |       |                                                                                    |
|---------------------------------------------------------------------------------------------------------------|-----------|--------------------------|-------|------------------------------------------------------------------------------------|
| hypoxic to proliferative cells                                                                                |           |                          |       |                                                                                    |
| Conversion rate of hypoxic to necrotic cells due to lack of oxygen                                            | $a_h$     | $b_h/10$                 | 1/day | Considered to be proportional to the proliferative to hypoxic conversion rate      |
| Conversion rate of hypoxic to necrotic cells due lack of glucose                                              | $a_{glh}$ | 0.01                     | 1/day | Considered constant in this model                                                  |
| Conversion rate of proliferative to hypoglycemic cells                                                        | $b_q$     | $(1 - gl/gl_0)/20$       | 1/day | Calculated to be proportional to the relative glucose concentration                |
| Conversion rate of hypoglycemic to proliferative cells                                                        | $g_q$     | 0.05                     | 1/day | [1]                                                                                |
| Conversion rate of hypoglycemic to necrotic cells due to lack of oxygen                                       | $a_q$     | 0.01                     | 1/day | Considered constant in this model                                                  |
| Conversion rate of hypoglycemic to necrotic cells due lack of glucose                                         | $a_{glq}$ | $b_q/10$                 | 1/day | Considered to be proportional to the proliferative to hypoglycemic conversion rate |
| Conversion rate of proliferative, hypoxic, hypoglycemic to necrotic cells due to contact with necrotic region | $a_n$     | $\log(2)/(50C_m^* 10^2)$ | 1/day | [1]                                                                                |

## References

- [1] Swanson KR, Rockne RC, Claridge J, Chaplain MA, Alvord Jr EC, Anderson ARA: **Quantifying the Role of Angiogenesis in Malignant Progression of Gliomas: In Silico Modeling Integrates Imaging and Histology**. *Int Sys Tech: Math Onc Cancer Res* 2011, **71**(24):7366–7375.
- [2] Swanson KR, Bridgea C, Murray JD, Alvord EC: **Virtual and real brain tumors: using mathematical modeling to quantify glioma growth and invasion**. *J Neurol Sc* 2003, **216**:1–10.
- [3] Martinez-Gonzalez A, Calvo GF, Romasanta LAP, Perez-Garcia VM: **Hypoxic Cell Waves around Necrotic Cores in Glioblastoma: A Biomathematical Model and its Therapeutic Implications**. *Bull Math Biol* 2012, **74**:2875–2896. [World Scientific Publishing Company].
- [4] Anderson ARA: **A hybrid mathematical model of solid tumour invasion: the importance of cell adhesion**. *Math Med Biol* 2005, **22**(2):163–186.
- [5] Anderson ARA, Chaplain MAJ, Newman EL, Steele RJC, Thompson AM: **Mathematical Modelling of Tumour Invasion and Metastasis**. *J Theor Med* 2000, **2**:129–151.
- [6] Kiran KL, Jayachandran D, Lakshminarayanan S: **Mathematical Modelling of Avascular Tumour Growth Based on Diffusion of Nutrients and Its Validation**. *Can J Chem Eng* 2009, **87**:732–740.
- [7] Casciari JJ, Sotirchos SV, Sutherland RM: **Mathematical Modelling of Microenvironment and Growth in EMT6/Ro Multicellular Tumour Spheroids**. *Cell Prolif* 1992, **25**:1–22.
- [8] Freyer JP, Sutherland RM: **A Reduction in the In Situ Rates of Oxygen and Glucose Consumption of Cells in EMT6/Ro Spheroids During Growth**. *J Cell Physiol* 1985, **124**:516–524.
- [9] Mueller-Klieser WF, Sutherland RM: **Oxygen Consumption and Oxygen Diffusion Properties of Multicellular Spheroids from Two Different Cell Lines**. *Adv Exp Med Biol* 1984, **180**:311–321.
- [10] Casciari JJ, Sotirchos SV, Sutherland RM: **Glucose Diffusivity in Multicellular Tumor Spheroids**. *Cancer Res* 1988, **48**:3905–3909.
- [11] Jeon J, Quaranta V, Cummings PT: **An off-lattice hybrid discrete-continuum model of tumor growth and invasion**. *Biophys J* 2010, **98**:37–47.
- [12] Freyer JP, Tustanoff E, Franko AJ, Sutherland RM: **In Situ Oxygen Consumption Rates of Cells in V-79 Multicellular Spheroids During Growth**. *J Cell Physiol* 1984, **118**:53–61.
- [13] Gerlee P, Anderson ARA: **A hybrid cellular automaton model of clonal evolution in cancer: The emergence of the glycolytic phenotype**. *J Theor Biol* 2008, **250**:705–722.
- [14] Jiang Y, Pjesivac-Grbovic J, Cantrell C, Freyer JP: **A Multiscale Model for Avascular Tumor Growth**. *Biophys J* 2005, **89**:3884–3894. [World Scientific Publishing Company].
- [15] Kim Y, Lawler S, Nowicki MO, Chiocca EA, Friedman A: **A mathematical model for pattern formation of glioma cells outside the tumor spheroid core**. *J Theor Biol* 2009, **260**:359–371.
