# Supplementary material for: Mathematical modelling of spatio-temporal glioma evolution
Source: Springer Nature journal article supplement (doi:10.1186/1742-4682-10-47), 2013-07-24

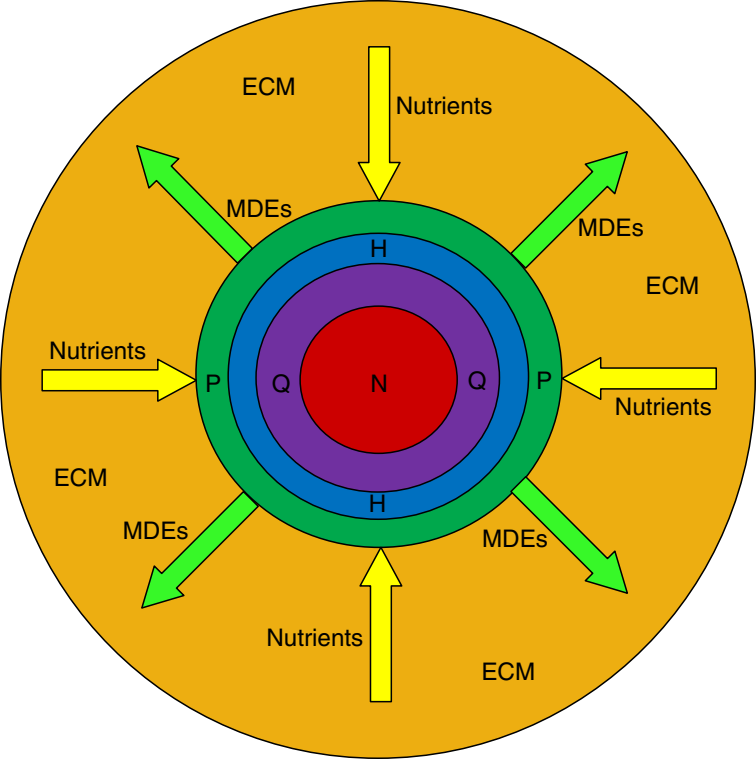

Supplement: 12976_2013_423_MOESM3_ESM.pdf [file 12976_2013_423_MOESM3_ESM.pdf]
